# Supplementary material for: Characteristics of Effective Interventions Promoting Healthy Eating for Pre-Schoolers in Childcare Settings: An Umbrella Review
Source: MDPI journal article supplement (doi:10.3390/nu10030293), 2018-03-01
Supplement: s1 [file s1]

## Effectiveness of interventions, strategies and practices on healthy eating in children 2-5 years in childcare: a systematic review of reviews

**Table S1: Record of search strategies**

All searches run 17/2/17

| Database                                                                                                            | Platform  | Number of retrieved citations |
|---------------------------------------------------------------------------------------------------------------------|-----------|-------------------------------|
| Medline 1946-present, includes Epub Ahead of Print; In-Process & Other Non-Indexed Citations; Ovid MEDLINE(R) Daily | Ovid      | 239                           |
| Emcare, 1995 to 2017 week 06                                                                                        | Ovid      | 303                           |
| PsycINFO, 1806 to February Week 1 2017                                                                              | Ovid      | 30                            |
| Embase, 1974 to 2017 February 16                                                                                    | Ovid      | 649                           |
| CINAHL                                                                                                              | EBSCOhost | 11                            |
| Joanna Briggs Institute EBP Database, Feb 08, 2017-                                                                 | Ovid      | 0                             |
| Cochrane Database of Systematic Reviews, Cochrane Database of Systematic Reviews: Issue 2 of 12, February 2017      | Wiley     | 3                             |
| Health Technology Assessment Database: Issue 4 of 4, October 2016                                                   | Wiley     | 1                             |
| ERIC                                                                                                                | ProQuest  | 7                             |
| Scopus                                                                                                              |           | 249                           |
| Web of Science Core Collection                                                                                      |           | 162                           |
| <b>Total before duplicates removed</b>                                                                              |           | <b>1654</b>                   |
| <b>Total after duplicates removed</b>                                                                               |           | <b>912?</b>                   |

Ovid MEDLINE(R) Epub Ahead of Print, In-Process & Other Non-Indexed Citations,  
Ovid MEDLINE(R) Daily and Ovid MEDLINE(R) 1946 to Present

| #  | Searches                                                                                                                                                                                                                                                                                                                                                                                                                                                                                                              | Results |
|----|-----------------------------------------------------------------------------------------------------------------------------------------------------------------------------------------------------------------------------------------------------------------------------------------------------------------------------------------------------------------------------------------------------------------------------------------------------------------------------------------------------------------------|---------|
| 1  | Child Care/                                                                                                                                                                                                                                                                                                                                                                                                                                                                                                           | 5284    |
| 2  | Child Day Care Centers/                                                                                                                                                                                                                                                                                                                                                                                                                                                                                               | 4649    |
| 3  | (Day care or Daycare or Childcare or "in child care" or "long day child child" or Occasional care or Out-of-home care or Nurser* or ((Preschool* or Pre-school* or Kindergarten* or Child care or Early child* or Early learning or Early education* or early years or home-based or centre-based or center based) adj3 (care or educat* or center* or centre* or setting* or attend* or provider* or work* or service* or home* or enrol* or environment* or policy or policies or facility or facilities))) .tw,kw. | 36274   |
| 4  | or/1-3                                                                                                                                                                                                                                                                                                                                                                                                                                                                                                                | 40821   |
| 5  | Child, Preschool/                                                                                                                                                                                                                                                                                                                                                                                                                                                                                                     | 821652  |
| 6  | (Child* or (Age* adj1 ("2-5" or "3-5")) or "Under 5" or "Under 5s" or Toddler* or Preschooler* or Pre-schooler* or pre-primary).tw,kw.                                                                                                                                                                                                                                                                                                                                                                                | 1196867 |
| 7  | or/5-6                                                                                                                                                                                                                                                                                                                                                                                                                                                                                                                | 1593221 |
| 8  | exp Diet/ or Child nutrition sciences/ or Child Nutritional Physiological Phenomena/ or Food services/ or Food habits/ or Food preferences/ or Menu planning/ or Cooking/ or Fruit/ or Vegetables/ or Food/ or Energy intake/ or Meals/ or Lunch/ or Snacks/ or Feeding behavior/ or Eating/ or Drinking/ or Nutritional requirements/ or Nutritional status/ or Recommended daily allowances/ or "Fruit and Vegetable Juices"/ or Milk/                                                                              | 481612  |
| 9  | (Diet* or Nutrition* or Eat or Eater* or Eating or Feed or Feeding or Food* or Drink* or Beverage* or Juice* or Milk* or Fruit* or Vegetables or Menu* or Lunch* or Breakfast* or snack* or Morning tea* or Afternoon tea* or ((Energy or calori* or kilojou* or nutrient*) adj1 (intake or consum*)) or ((portion* or serving or plate*) adj1 (size* or wast*)) or cook* or cater*).tw,kw.                                                                                                                           | 1315314 |
| 10 | or/8-9                                                                                                                                                                                                                                                                                                                                                                                                                                                                                                                | 1436846 |
| 11 | 4 and 7 and 10                                                                                                                                                                                                                                                                                                                                                                                                                                                                                                        | 3761    |
| 12 | (meta analys* or metaanalys*).mp,pt. or review*.ti,pt. or (search* or MEDLINE or systematic review or synthesis).tw.                                                                                                                                                                                                                                                                                                                                                                                                  | 3196110 |
| 13 | 11 and 12                                                                                                                                                                                                                                                                                                                                                                                                                                                                                                             | 332     |
| 14 | (infan* not child*).ti.                                                                                                                                                                                                                                                                                                                                                                                                                                                                                               | 169275  |
| 15 | 13 not 14                                                                                                                                                                                                                                                                                                                                                                                                                                                                                                             | 314     |
| 16 | (case reports or comment or editorial or letter or news).pt.                                                                                                                                                                                                                                                                                                                                                                                                                                                          | 3357292 |
| 17 | 15 not 16                                                                                                                                                                                                                                                                                                                                                                                                                                                                                                             | 307     |
| 18 | limit 17 to yr="2000 -Current"                                                                                                                                                                                                                                                                                                                                                                                                                                                                                        | 239     |

Ovid Emcare 1995 to 2017 week 06

| #  | Searches                                                                                                                                                                                                                                                                                                                                                                                                                                                                                                                                 | Results |
|----|------------------------------------------------------------------------------------------------------------------------------------------------------------------------------------------------------------------------------------------------------------------------------------------------------------------------------------------------------------------------------------------------------------------------------------------------------------------------------------------------------------------------------------------|---------|
| 1  | child care/ or kindergarten/ or nursery/                                                                                                                                                                                                                                                                                                                                                                                                                                                                                                 | 19350   |
| 2  | day care/                                                                                                                                                                                                                                                                                                                                                                                                                                                                                                                                | 3477    |
| 3  | (Day care or Daycare or "day child care" or Childcare or "in child care" or "long day child care" or Occasional care or Out-of-home care or Nurser* or ((Preschool* or Pre-school* or Kindergarten* or Child care or Early child* or Early learning or Early education* or early years or home-based or centre-based or center based) adj3 (care or educat* or center* or centre* or setting* or attend* or provider* or work* or service* or home* or enrol* or environment* or policy or policies or facility or facilities))) .tw,kw. | 18404   |
| 4  | or/1-3                                                                                                                                                                                                                                                                                                                                                                                                                                                                                                                                   | 32522   |
| 5  | preschool child/                                                                                                                                                                                                                                                                                                                                                                                                                                                                                                                         | 69625   |
| 6  | (Child* or (Age* adj1 ("2-5" or "3-5")) or "Under 5" or "Under 5s" or Toddler* or Preschooler* or Pre-schooler* or pre-primary).tw,kw.                                                                                                                                                                                                                                                                                                                                                                                                   | 387495  |
| 7  | or/5-6                                                                                                                                                                                                                                                                                                                                                                                                                                                                                                                                   | 409350  |
| 8  | exp diet/ or nutritional science/ or child nutrition/ or catering service/ or feeding behavior/ or eating habit/ or food preference/ or portion size/ or cooking/ or fruit/ or fruit juice/ or "fruit and vegetable juice"/ or vegetable juice/ or food/ or caloric intake/ or meal/ or fast food/ or feeding behavior/ or drinking/ or eating/ or nutritional requirement/ or nutritional status/ or milk/                                                                                                                              | 172475  |
| 9  | (Diet* or Nutrition* or Eat or Eater* or Eating or Feed or Feeding or Food* or Drink* or Beverage* or Juice* or Milk* or Fruit* or Vegetables or Menu* or Lunch* or Breakfast* or snack* or Morning tea* or Afternoon tea* or ((Energy or calori* or kilojou* or nutrient*) adj1 (intake or consum*)) or ((portion* or serving or plate*) adj1 (size* or wast*)) or cook* or cater*).tw,kw.                                                                                                                                              | 326887  |
| 10 | or/8-9                                                                                                                                                                                                                                                                                                                                                                                                                                                                                                                                   | 347638  |
| 11 | 4 and 7 and 10                                                                                                                                                                                                                                                                                                                                                                                                                                                                                                                           | 2653    |
| 12 | (meta analys* or metaanalys*).mp,pt. or review.ti,pt. or (search* or MEDLINE or synthesis).ab. or systematic review.tw,sh.                                                                                                                                                                                                                                                                                                                                                                                                               | 709924  |
| 13 | 11 and 12                                                                                                                                                                                                                                                                                                                                                                                                                                                                                                                                | 341     |
| 14 | (infan* not child*).ti.                                                                                                                                                                                                                                                                                                                                                                                                                                                                                                                  | 37959   |
| 15 | 13 not 14                                                                                                                                                                                                                                                                                                                                                                                                                                                                                                                                | 328     |
| 16 | (editorial or letter or note).pt.                                                                                                                                                                                                                                                                                                                                                                                                                                                                                                        | 691896  |
| 17 | 15 not 16                                                                                                                                                                                                                                                                                                                                                                                                                                                                                                                                | 326     |
| 18 | limit 17 to yr="2000 -Current"                                                                                                                                                                                                                                                                                                                                                                                                                                                                                                           | 303     |

# PsycINFO 1806 to February Week 2 2017

| #  | Searches                                                                                                                                                                                                                                                                                                                                                                                                                                                                                                                                    | Results |
|----|---------------------------------------------------------------------------------------------------------------------------------------------------------------------------------------------------------------------------------------------------------------------------------------------------------------------------------------------------------------------------------------------------------------------------------------------------------------------------------------------------------------------------------------------|---------|
| 1  | child care/ or child day care/ or preschool students/ or nursery school students/ or kindergarten students/                                                                                                                                                                                                                                                                                                                                                                                                                                 | 22585   |
| 2  | (Day care or Daycare or Childcare or "day child care" or "in child care" or "long day child care" or Occasional care or Out-of-home care or Nurser* or ((Preschool* or Pre-school* or Kindergarten* or Child care or Early child* or Early learning or Early education* or early years or home-based or centre-based or center based) adj3 (care or educat* or center* or centre* or setting* or attend* or provider* or work* or service* or home* or enrol* or environment* or policy or policies or facility or facilities))) .ti,ab,id. | 35883   |
| 3  | or/1-2                                                                                                                                                                                                                                                                                                                                                                                                                                                                                                                                      | 49333   |
| 4  | (Child* or (Age* adj1 ("2-5" or "3-5")) or "Under 5" or "Under 5s" or Toddler* or Preschooler* or Pre-schooler* or pre-primary).ti,ab,id.                                                                                                                                                                                                                                                                                                                                                                                                   | 622000  |
| 5  | preschool age 2 5 yrs.ag.                                                                                                                                                                                                                                                                                                                                                                                                                                                                                                                   | 115538  |
| 6  | or/4-5                                                                                                                                                                                                                                                                                                                                                                                                                                                                                                                                      | 637379  |
| 7  | diets/ or eating behavior/ or fast food/ or food preferences/ or nutrition/ or food/ or fast food/ or food intake/ or food preparation/                                                                                                                                                                                                                                                                                                                                                                                                     | 47095   |
| 8  | (Diet* or Nutrition* or Eat or Eater* or Eating or Feed or Feeding or Food* or Drink* or Beverage* or Juice* or Milk* or Fruit* or Vegetables or Menu* or Lunch* or Breakfast* or snack* or Morning tea* or Afternoon tea* or ((Energy or calori* or kilojou* or nutrient*) adj1 (intake or consum*)) or ((portion* or serving or plate*) adj1 (size* or wast*)) or cook* or cater*).ti,ab,id.                                                                                                                                              | 212956  |
| 9  | or/7-8                                                                                                                                                                                                                                                                                                                                                                                                                                                                                                                                      | 214881  |
| 10 | 3 and 6 and 9                                                                                                                                                                                                                                                                                                                                                                                                                                                                                                                               | 1873    |
| 11 | (systematic review or meta analysis or metasyntesis).md,mp. or (search or medline or synthesis).ti,ab.                                                                                                                                                                                                                                                                                                                                                                                                                                      | 115007  |
| 12 | 10 and 11                                                                                                                                                                                                                                                                                                                                                                                                                                                                                                                                   | 33      |
| 13 | (infan* not child*).ti.                                                                                                                                                                                                                                                                                                                                                                                                                                                                                                                     | 29128   |
| 14 | 12 not 13                                                                                                                                                                                                                                                                                                                                                                                                                                                                                                                                   | 32      |
| 15 | (column* or comment* or editorial or letter).dt.                                                                                                                                                                                                                                                                                                                                                                                                                                                                                            | 179335  |
| 16 | 14 not 15                                                                                                                                                                                                                                                                                                                                                                                                                                                                                                                                   | 32      |

# Embase 1974 to 2017 February 16

| # | Searches                                                           | Results |
|---|--------------------------------------------------------------------|---------|
| 1 | child care/ or kindergarten/ or nursery/ or day care/              | 53995   |
| 2 | (Day care or Daycare or "day child care" or Childcare or "in child | 43368   |

|    |                                                                                                                                                                                                                                                                                                                                                                                                                                             |         |
|----|---------------------------------------------------------------------------------------------------------------------------------------------------------------------------------------------------------------------------------------------------------------------------------------------------------------------------------------------------------------------------------------------------------------------------------------------|---------|
|    | care" or Occasional care or Out-of-home care or Nurser* or ((Preschool* or Pre-school* or Kindergarten* or Child care or Early child* or Early learning or Early education* or early years or home-based or centre-based or center based) adj3 (care or educat* or center* or centre* or setting* or attend* or provider* or work* or service* or home* or enrol* or environment* or policy or policies or facility or facilities))).tw,kw. |         |
| 3  | or/1-2                                                                                                                                                                                                                                                                                                                                                                                                                                      | 80284   |
| 4  | preschool child/                                                                                                                                                                                                                                                                                                                                                                                                                            | 541354  |
| 5  | (Child* or (Age* adj1 ("2-5" or "3-5")) or "Under 5" or "Under 5s" or Toddler* or Preschooler* or Pre-schooler* or pre-primary).tw,kw.                                                                                                                                                                                                                                                                                                      | 1478970 |
| 6  | or/4-5                                                                                                                                                                                                                                                                                                                                                                                                                                      | 1731472 |
| 7  | exp diet/ or nutritional science/ or child nutrition/ or catering service/ or feeding behavior/ or eating habit/ or food preference/ or portion size/ or cooking/ or fruit/ or fruit juice/ or "fruit and vegetable juice"/ or vegetable juice/ or food/ or caloric intake/ or meal/ or fast food/ or feeding behavior/ or drinking/ or eating/ or nutritional requirement/ or nutritional status/ or milk/                                 | 764626  |
| 8  | (Diet* or Nutrition* or Eat or Eater* or Eating or Feed or Feeding or Food* or Drink* or Beverage* or Juice* or Milk* or Fruit* or Vegetables or Menu* or Lunch* or Breakfast* or snack* or Morning tea* or Afternoon tea* or ((Energy or calori* or kilojou* or nutrient*) adj1 (intake or consum*)) or ((portion* or serving or plate*) adj1 (size* or wast*)) or cook* or cater*).tw,kw.                                                 | 1616195 |
| 9  | or/7-8                                                                                                                                                                                                                                                                                                                                                                                                                                      | 1731079 |
| 10 | 3 and 6 and 9                                                                                                                                                                                                                                                                                                                                                                                                                               | 6326    |
| 11 | (meta analys* or metaanalys*).mp,pt. or review.ti,pt. or (search* or MEDLINE or synthesis).ab. or systematic review.tw,sh.                                                                                                                                                                                                                                                                                                                  | 3335034 |
| 12 | 10 and 11                                                                                                                                                                                                                                                                                                                                                                                                                                   | 797     |
| 13 | (infan* not child*).ti.                                                                                                                                                                                                                                                                                                                                                                                                                     | 176689  |
| 14 | 12 not 13                                                                                                                                                                                                                                                                                                                                                                                                                                   | 749     |
| 15 | (editorial or letter or note).pt.                                                                                                                                                                                                                                                                                                                                                                                                           | 2183151 |
| 16 | 14 not 15                                                                                                                                                                                                                                                                                                                                                                                                                                   | 748     |

#### CINAHL (EBSCOhost)

| #  | Query                                                                             | Limiters/Expanders            | Results |
|----|-----------------------------------------------------------------------------------|-------------------------------|---------|
| S1 | (MH "Child Day Care") OR (MH "Schools, Nursery")                                  | Search modes - Boolean/Phrase | 2,248   |
| S2 | TI ( "Day care" OR Daycare OR "day child care" OR Childcare OR "in child care" OR | Search modes - Boolean/Phrase | 12,779  |

|    |                                                                                                                                                                                                                                                                                                                                                                                                                                                                                                                                                                                                                                                                                                                                                                                                                                                                                                                                                                                                |                               |         |
|----|------------------------------------------------------------------------------------------------------------------------------------------------------------------------------------------------------------------------------------------------------------------------------------------------------------------------------------------------------------------------------------------------------------------------------------------------------------------------------------------------------------------------------------------------------------------------------------------------------------------------------------------------------------------------------------------------------------------------------------------------------------------------------------------------------------------------------------------------------------------------------------------------------------------------------------------------------------------------------------------------|-------------------------------|---------|
|    | "long day child care" OR "Occasional care" OR "Out-of-home care" OR Nurser* OR ((Preschool* OR "Pre-school*" OR Kindergarten* OR "Child care" OR "Early child*" OR "Early learning" OR "Early education*" OR "early years" OR "home-based" OR "centre-based" OR "center based") N2 (care OR educat* OR center* OR centre* OR setting* OR attend* OR provider* OR work* OR service* OR home* OR enrol* OR environment* OR policy OR policies OR facility OR facilities))) ) OR AB ( ("Day care" OR Daycare OR Childcare OR "in child care" OR "Occasional care" OR "Out-of-home care" OR Nurser* OR ((Preschool* OR "Pre-school*" OR Kindergarten* OR "Child care" OR "Early child*" OR "Early learning" OR "Early education*" OR "early years" OR "home-based" OR "centre-based" OR "center based") N2 (care OR educat* OR center* OR centre* OR setting* OR attend* OR provider* OR work* OR service* OR home* OR enrol* OR environment* OR policy OR policies OR facility OR facilities))) ) |                               |         |
| S3 | S1 OR S2                                                                                                                                                                                                                                                                                                                                                                                                                                                                                                                                                                                                                                                                                                                                                                                                                                                                                                                                                                                       | Search modes - Boolean/Phrase | 13,684  |
| S4 | TI ( (Child* OR (Age* N0 ("2-5" OR "3-5")) OR "Under 5" OR "Under 5s" OR Toddler* OR Preschooler* OR "Pre-schooler*" OR "pre-primary") ) OR AB ( (Child* OR (Age* N0 ("2-5" OR "3-5")) OR "Under 5" OR "Under 5s" OR Toddler* OR Preschooler* OR "Pre-schooler*" OR "pre-primary") )                                                                                                                                                                                                                                                                                                                                                                                                                                                                                                                                                                                                                                                                                                           | Search modes - Boolean/Phrase | 209,646 |
| S5 | (MH "Child, Preschool")                                                                                                                                                                                                                                                                                                                                                                                                                                                                                                                                                                                                                                                                                                                                                                                                                                                                                                                                                                        | Search modes - Boolean/Phrase | 102,931 |
| S6 | S4 OR S5                                                                                                                                                                                                                                                                                                                                                                                                                                                                                                                                                                                                                                                                                                                                                                                                                                                                                                                                                                                       | Search modes - Boolean/Phrase | 250,454 |
| S7 | TI ( (Diet* OR Nutrition* OR Eat OR Eater* OR Eating OR Feed OR Feeding OR Food* OR Drink* OR Beverage* OR Juice* OR Milk* OR Fruit* OR Vegetables OR Menu* OR Lunch* OR Breakfast* OR snack* OR "Morning tea*" OR "Afternoon tea*" OR ((Energy OR calor* OR kilojou* OR                                                                                                                                                                                                                                                                                                                                                                                                                                                                                                                                                                                                                                                                                                                       | Search modes - Boolean/Phrase | 35,927  |

|     |                                                                                                                                                                                                                                                                                                                                                                                                                                                                                                                           |                                                                                                                                                   |         |
|-----|---------------------------------------------------------------------------------------------------------------------------------------------------------------------------------------------------------------------------------------------------------------------------------------------------------------------------------------------------------------------------------------------------------------------------------------------------------------------------------------------------------------------------|---------------------------------------------------------------------------------------------------------------------------------------------------|---------|
|     | nutrient*) N0 (intake OR consum*)) OR ((portion* OR serving OR plate*) N0 (size* OR wast*)) OR cook* OR cater*) ) AND AB ( (Diet* OR Nutrition* OR Eat OR Eater* OR Eating OR Feed OR Feeding OR Food* OR Drink* OR Beverage* OR Juice* OR Milk* OR Fruit* OR Vegetables OR Menu* OR Lunch* OR Breakfast* OR snack* OR "Morning tea*" OR "Afternoon tea*" OR ((Energy OR kalori* OR kilojou* OR nutrient*) N0 (intake OR consum*)) OR ((portion* OR serving OR plate*) N0 (size* OR wast*)) OR cook* OR cater*) )         |                                                                                                                                                   |         |
| S8  | (MH "Child Nutritional Physiology") OR (MH "Diet+") OR (MH "Child Nutrition") OR (MH "Food Services") OR (MH "Menu Planning") OR (MH "Food Preferences") OR (MH "Eating Behavior") OR (MH "Food Habits") OR (MH "Meal Preparation") OR (MH "Cooking") OR (MH "Fruit") OR (MH "Vegetables") OR (MH "Meals") OR (MH "Breakfast") OR (MH "Lunch") OR (MH "Snacks") OR (MH "Eating") OR (MH "Drinking Behavior") OR (MH "Nutritional Requirements") OR (MH "Dietary Reference Intakes") OR (MH "Fruit Juices") OR (MH "Milk") | Search modes - Boolean/Phrase                                                                                                                     | 85,253  |
| S9  | S7 OR S8                                                                                                                                                                                                                                                                                                                                                                                                                                                                                                                  | Search modes - Boolean/Phrase                                                                                                                     | 104,956 |
| S10 | S3 AND S6 AND S9                                                                                                                                                                                                                                                                                                                                                                                                                                                                                                          | Search modes - Boolean/Phrase                                                                                                                     | 625     |
| S11 | (MH "Systematic Review") OR (MH "Meta Analysis")                                                                                                                                                                                                                                                                                                                                                                                                                                                                          | Search modes - Boolean/Phrase                                                                                                                     | 39,187  |
| S12 | PT ( Meta Analysis OR Meta Synthesis OR Systematic Review ) OR TI ( meta analys* OR metaanalys* OR "systematic review" ) OR AB ( meta analys* OR metaanalys* OR "systematic review" )                                                                                                                                                                                                                                                                                                                                     | Limiters - Published Date: 20000101-20171231; Publication Type: Meta Analysis, Meta Synthesis, Systematic Review<br>Search modes - Boolean/Phrase | 40,646  |
| S13 | S11 OR S12                                                                                                                                                                                                                                                                                                                                                                                                                                                                                                                | Search modes - Boolean/Phrase                                                                                                                     | 54,758  |
| S14 | S10 AND S13                                                                                                                                                                                                                                                                                                                                                                                                                                                                                                               | Search modes -                                                                                                                                    | 11      |

|  |                |  |
|--|----------------|--|
|  | Boolean/Phrase |  |
|--|----------------|--|

Joanna Briggs Institute EBP Database - Current to February 08, 2017

| # | Searches                                                                                                                                                                                                                                                                                                                                                                                                                                                                                                                                                                                                                                                                                                                                                                                                                                                                                                                                                                                                                                             | Results |
|---|------------------------------------------------------------------------------------------------------------------------------------------------------------------------------------------------------------------------------------------------------------------------------------------------------------------------------------------------------------------------------------------------------------------------------------------------------------------------------------------------------------------------------------------------------------------------------------------------------------------------------------------------------------------------------------------------------------------------------------------------------------------------------------------------------------------------------------------------------------------------------------------------------------------------------------------------------------------------------------------------------------------------------------------------------|---------|
| 1 | (Day care or Daycare or Childcare or "in child care" or "long day child care" or Occasional care or Out-of-home care or Nurser* or ((Preschool* or Pre-school* or Kindergarten* or Child care or Early child* or Early learning or Early education* or early years or home-based or centre-based or center based) adj3 (care or educat* or center* or centre* or setting* or attend* or provider* or work* or service* or home* or enrol* or environment* or policy or policies or facility or facilities))) .ti,hw,sh.                                                                                                                                                                                                                                                                                                                                                                                                                                                                                                                              | 21      |
| 2 | (Child* or (Age* adj1 ("2-5" or "3-5")) or "Under 5" or "Under 5s" or Toddler* or Preschooler* or Pre-schooler* or pre-primary).ti,hw,sh.                                                                                                                                                                                                                                                                                                                                                                                                                                                                                                                                                                                                                                                                                                                                                                                                                                                                                                            | 337     |
| 3 | (Diet* or Nutrition* or Eat or Eater* or Eating or Feed or Feeding or Food* or Drink* or Beverage* or Juice* or Milk* or Fruit* or Vegetables or Menu* or Lunch* or Breakfast* or snack* or Morning tea* or Afternoon tea* or ((Energy or kalori* or kilojou* or nutrient*) adj1 (intake or consum*)) or ((portion* or serving or plate*) adj1 (size* or wast*)) or cook* or cater*).ti,hw,sh.                                                                                                                                                                                                                                                                                                                                                                                                                                                                                                                                                                                                                                                       | 289     |
| 4 | ((Day care or Daycare or Childcare or "in child care" or "long day child care" or Occasional care or Out-of-home care or Nurser* or ((Preschool* or Pre-school* or Kindergarten* or Child care or Early child* or Early learning or Early education* or early years or home-based or centre-based or center based) adj3 (care or educat* or center* or centre* or setting* or attend* or provider* or work* or service* or home* or enrol* or environment* or policy or policies or facility or facilities))) and (Child* or (Age* adj1 ("2-5" or "3-5")) or "Under 5" or "Under 5s" or Toddler* or Preschooler* or Pre-schooler* or pre-primary) and (Diet* or Nutrition* or Eat or Eater* or Eating or Feed or Feeding or Food* or Drink* or Beverage* or Juice* or Milk* or Fruit* or Vegetables or Menu* or Lunch* or Breakfast* or snack* or Morning tea* or Afternoon tea* or ((Energy or kalori* or kilojou* or nutrient*) adj1 (intake or consum*)) or ((portion* or serving or plate*) adj1 (size* or wast*)) or cook* or cater*).ti,hw,sh. | 0       |
| 5 | limit 4 to systematic reviews                                                                                                                                                                                                                                                                                                                                                                                                                                                                                                                                                                                                                                                                                                                                                                                                                                                                                                                                                                                                                        | 0       |

Web of Science Core Collection

N=162

("Day care" OR Daycare OR Childcare OR "in child care" OR "long day child care" OR "Occasional care" OR "Out-of-home care" OR Nurser\* OR ((Preschool\* OR



"Pre-school\*" OR Kindergarten\* OR "Child care" OR "Early child\*" OR "Early learning" OR "Early education\*" OR "early years" OR "home-based" OR "centre-based" OR "center based") NEAR/2 (care OR educat\* OR center\* OR centre\* OR setting\* OR attend\* OR provider\* OR work\* OR service\* OR home\* OR enrol\* OR environment\* OR policy OR policies OR facility OR facilities))) AND (Child\* OR (Age\* NEAR/0 ("2-5" OR "3-5")) OR "Under 5" OR "Under 5s" OR Toddler\* OR Preschooler\* OR "Pre-schooler\*" OR "pre-primary") AND ((Diet\* OR Nutrition\* OR Eat OR Eater\* OR Eating OR Feed OR Feeding OR Food\* OR Drink\* OR Beverage\* OR Juice\* OR Milk\* OR Fruit\* OR Vegetables OR Menu\* OR Lunch\* OR Breakfast\* OR snack\* OR Morning tea\* OR Afternoon tea\* OR ((Energy OR kalori\* OR kilojou\* OR nutrient\*) NEAR/0 (intake OR consum\*)) OR ((portion\* OR serving or plate\*) NEAR/0 (size\* OR wast\*)) OR cook\* OR cater\*))

Refined by: PUBLICATION YEARS: ( 2016 OR 2003 OR 2015 OR 2014 OR 2013 OR 2012 OR 2002 OR 2010 OR 2011 OR 2009 OR 2008 OR 2007 OR 2006 OR 2005 OR 2017 OR 2004 OR 2000 OR 2001 ) AND **DOCUMENT TYPES: ( REVIEW )**

Timespan: All years. Indexes: SCI-EXPANDED, SSCI, A&HCI, CPCI-S, CPCI-SSH, ESCI, CCR-EXPANDED, IC.

#### ERIC (Educational Resources Information Center)

N=7

((("Day care" OR Daycare OR Childcare OR "in child care" OR "day child care" OR "Occasional care" OR "Out-of-home care" OR Nurser\* OR ((Preschool\* OR "Pre-school\*" OR Kindergarten\* OR "Child care" OR "Early child\*" OR "Early learning" OR "Early education\*" OR "early years" OR "home-based" OR "centre-based" OR "center based") NEAR/2 (care OR educat\* OR center\* OR centre\* OR setting\* OR attend\* OR provider\* OR work\* OR service\* OR home\* OR enrol\* OR environment\* OR policy OR policies OR facility OR facilities))) AND (Child\* OR (Age\* NEAR/0 ("2-5" OR "3-5")) OR "Under 5" OR "Under 5s" OR Toddler\* OR Preschooler\* OR "Pre-schooler\*" OR "pre-primary") AND ((Diet\* OR Nutrition\* OR Eat OR Eater\* OR Eating OR Feed OR Feeding OR Food\* OR Drink\* OR Beverage\* OR Juice\* OR Milk\* OR Fruit\* OR Vegetables OR Menu\* OR Lunch\* OR Breakfast\* OR snack\* OR "Morning tea\*" OR "Afternoon tea\*" OR ((Energy OR kalori\* OR kilojou\* OR nutrient\*) NEAR/0 (intake OR consum\*)) OR ((portion\* OR serving or plate\*) NEAR/0 (size\* OR wast\*)) OR cook\* OR cater\*))

#### Scopus

n=249

(( ( TITLE-ABS-KEY ( "Day care" OR daycare OR childcare OR "in child care" OR "day child care" OR "Occasional care" OR "Out-of-home care" OR "long day child care" OR nurser\* ) ) OR ( TITLE-ABS-

KEY ( ( ( preschool\* OR "Pre-school\*" OR kindergarten\* OR "Child  
 care" OR "Early child\*" OR "Early learning" OR "Early education\*" OR "early  
 years" OR "home-based" OR "centre-based" OR "center  
 based" ) near/2 ( care OR educat\* OR center\* OR centre\* OR setting\* OR at  
 tend\* OR provider\* OR work\* OR service\* OR home\* OR enrol\* OR environ  
 ment\* OR policy OR policies OR facility OR facilities ) ) ) ) AND ( TITLE-  
 ABS-KEY ( child\* OR ( ( age OR aged OR ages ) W/0 ( "2-5" OR "3-  
 5" ) ) OR "Under 5" OR "Under 5s" OR toddler\* OR preschooler\* OR "Pre-  
 schooler\*" OR "pre-primary" ) ) ) AND ( ( TITLE-ABS-  
 KEY ( diet\* OR nutrition\* OR eat OR eater\* OR eating OR feed OR feeding O  
 R food\* OR drink\* OR beverage\* OR juice\* OR milk\* ) ) OR ( TITLE-ABS-  
 KEY ( fruit\* OR vegetables OR menu\* OR lunch\* OR breakfast\* OR snack\* O  
 R "Morning tea\*" OR "Afternoon tea\*" ) ) OR ( TITLE-ABS-  
 KEY ( ( ( energy OR calori\* OR kilojou\* OR nutrient\* ) W/0 ( intake OR cons  
 um\* ) ) ) ) OR ( TITLE-ABS-  
 KEY ( ( ( portion\* OR serving OR plate\* ) near/0 ( size\* OR wast\* ) ) ) ) OR (   
 TITLE-ABS-  
 KEY ( ( ( portion\* OR serving OR plate\* ) W/0 ( size\* OR wast\* ) ) ) ) OR ( TI  
 TLE-ABS-KEY ( cook\* OR cater\* ) ) ) AND ( LIMIT-  
 TO ( PUBYEAR, 2017 ) OR LIMIT-TO ( PUBYEAR, 2016 ) OR LIMIT-  
 TO ( PUBYEAR, 2015 ) OR LIMIT-TO ( PUBYEAR, 2014 ) OR LIMIT-  
 TO ( PUBYEAR, 2013 ) OR LIMIT-TO ( PUBYEAR, 2012 ) OR LIMIT-  
 TO ( PUBYEAR, 2011 ) OR LIMIT-TO ( PUBYEAR, 2010 ) OR LIMIT-  
 TO ( PUBYEAR, 2009 ) OR LIMIT-TO ( PUBYEAR, 2008 ) OR LIMIT-  
 TO ( PUBYEAR, 2007 ) OR LIMIT-TO ( PUBYEAR, 2006 ) OR LIMIT-  
 TO ( PUBYEAR, 2005 ) OR LIMIT-TO ( PUBYEAR, 2004 ) OR LIMIT-  
 TO ( PUBYEAR, 2003 ) OR LIMIT-TO ( PUBYEAR, 2002 ) OR LIMIT-  
 TO ( PUBYEAR, 2001 ) OR LIMIT-TO ( PUBYEAR, 2000 ) ) AND ( LIMIT-  
 TO ( DOCTYPE, "re" ) )
