# Supplementary material for: Characteristics of Effective Interventions Promoting Healthy Eating for Pre-Schoolers in Childcare Settings: An Umbrella Review
Source: MDPI journal article supplement (doi:10.3390/nu10030293), 2018-03-01
Supplement: s1 [file s1]

## Repository

Table S3: Characteristics of included systematic reviews (using JBI Data Extraction Form for Systematic Reviews and Research Syntheses, Aromataris et al 2015, The Johanna Briggs Institute 2014)

| Author/Year of publication | Systematic review objectives                                                                                                                                                                                                                                                                                 | Participant characteristics/sample/setting                                                                                                                                                                                                    | Description of interventions                                                                                                                                                                                                       | Sources searched                                         | Year range of included studies | Number of included primary studies /Total number of diet-related studies in review (Total number of studies in review) | Types of studies/number and types of study design of included studies                                                                                                                                                                                                                                                                               | Country of origin of included studies                               | Appraisal rating of included studies/Appraisal instrument used |
|----------------------------|--------------------------------------------------------------------------------------------------------------------------------------------------------------------------------------------------------------------------------------------------------------------------------------------------------------|-----------------------------------------------------------------------------------------------------------------------------------------------------------------------------------------------------------------------------------------------|------------------------------------------------------------------------------------------------------------------------------------------------------------------------------------------------------------------------------------|----------------------------------------------------------|--------------------------------|------------------------------------------------------------------------------------------------------------------------|-----------------------------------------------------------------------------------------------------------------------------------------------------------------------------------------------------------------------------------------------------------------------------------------------------------------------------------------------------|---------------------------------------------------------------------|----------------------------------------------------------------|
| Bell & Golley 2015         | <i>Primary</i><br>Evaluate the effectiveness of nutrition promotion interventions on children's dietary intake<br><i>Secondary</i><br>Evaluate environmental and individual factors; centre's nutrition policies, centre's practices, food provided, knowledge and attitudes of educators, parents, children | Children 0-5 years, providers and staff or parents of children in formal childcare care<br><br>Children n=28-8950 (total 18998)<br>Educators/directors/ cooks n=9-87 (total 385)<br>Staff n=30-496 (total 994)<br>Centres n=1-229 (total 575) | Any intervention that included a nutrition component targeting staff (e.g. training), children (e.g. nutrition curriculum) or parents/ caregivers (e.g. education sessions) that aimed to influence children's nutritional intake. | CINAHL, Medline (n=2) Reference lists and recent reviews | Up to June 2013                | 25/26 (excluded Bravo et al 2008 as FDC study)                                                                         | Prospective studies with or without a comparison group, evaluating the effectiveness of an intervention of any duration, with outcomes measured at baseline and post intervention<br><br>9 cohort pre-post studies, 7 CCT, 1 pilot CCT, 1 cross-over study, 4 RCT, 1 cross-over cluster-RCT, 1 pilot cohort, 1 cross-over quasi-experimental design | USA (n=19), Australia (n=4), Germany (n=1) UK (n=1)                 | 14 weak, 11 moderate quality                                   |
| Hesketh & Campbell 2010    | Evaluate effectiveness of interventions designed to prevent obesity, promote healthy eating and/or physical activity or reduce                                                                                                                                                                               | Children 0-5 years<br>Family/home, group, primary care, pre-school/formal childcare and mixed settings                                                                                                                                        | Any intervention designed to prevent obesity, promote healthy eating and/or                                                                                                                                                        | Academic Search Premier, Cumulative Index to             | Jan 1995-Aug 2008              | 3/9 (23 studies in all settings) 9 in preschool or                                                                     | Experimental studies<br>2 cluster- RCT, 1 CCT                                                                                                                                                                                                                                                                                                       | Not reported but mostly in the USA. All diet-related studies in USA | 2 moderate, 1 strong quality                                   |

## Repository

|                    |                                                                                                                                                                                                   |                                                                                                                                                                       |                                                                                                                                                             |                                                                                                                                                                                                                                                                                                                                                                          |                      |                                                                                                                                                                                                                                                                                                       |                                                                   |                                                                                                                                      |                                                                                                  |
|--------------------|---------------------------------------------------------------------------------------------------------------------------------------------------------------------------------------------------|-----------------------------------------------------------------------------------------------------------------------------------------------------------------------|-------------------------------------------------------------------------------------------------------------------------------------------------------------|--------------------------------------------------------------------------------------------------------------------------------------------------------------------------------------------------------------------------------------------------------------------------------------------------------------------------------------------------------------------------|----------------------|-------------------------------------------------------------------------------------------------------------------------------------------------------------------------------------------------------------------------------------------------------------------------------------------------------|-------------------------------------------------------------------|--------------------------------------------------------------------------------------------------------------------------------------|--------------------------------------------------------------------------------------------------|
|                    | sedentary behaviours                                                                                                                                                                              | Children n=1,810<br>Centres- not reported                                                                                                                             | physical activity or<br>reduce sedentary<br>behaviour                                                                                                       | Nursing and<br>Allied Health<br>Literature,<br>Cochrane<br>Central<br>Register of<br>Controlled<br>Trials,<br>Communicatio<br>n, Global<br>Health, Health<br>Source:<br>Nursing/Acade<br>mic, Medline,<br>Psycharticles,<br>PsychINFO,<br>Psychology,<br>and Behavioral<br>Sciences<br>(n=10)<br>Reference lists<br>Contacted<br>researchers<br>with emerging<br>studies |                      | childcare, 3<br>of these diet<br>related<br><br>Included<br>studies:<br>Fitzgibbon et<br>al 2005,<br>Fitzgibbon et<br>al 2006,<br>Williams et al<br>2004                                                                                                                                              |                                                                   |                                                                                                                                      |                                                                                                  |
| Ling & Wen<br>2016 | <i>Primary</i><br>Examine effects of<br>prevention and<br>management interventions<br>on overweight/<br>obesity <i>Secondary</i><br>Explore factors that may<br>influence intervention<br>effects | Formal childcare/preschool,<br>community and home<br>settings<br>Children aged 2–5 years<br><br>295 centres (range 4 to 79),<br>7,805 (range 101 to 1663)<br>children | Any intervention<br>that aimed to<br>improve<br>behaviours,<br>including screen<br>time, sedentary<br>activity, physical<br>activity, diet,<br>and/or sleep | PubMed,<br>CINAHL,<br>EMBASE,<br>PsycINFO,<br>ERIC, and<br>Cochrane<br>library<br>n=6<br>Reference lists<br>of reviews                                                                                                                                                                                                                                                   | Up to<br>Feb<br>2015 | 13/19 (26<br>studies in all<br>settings)<br>Nutrition/PA<br>x 12 studies<br>Nutrition only<br>x 1<br><br>Excluded<br>studies which<br>were PA only<br>or sedentary<br>behaviour<br>only: Annesi<br>et al 2013a,<br>2013b,<br>Bonvin et al<br>2013, De<br>Bock 2013,<br>Dennison et<br>al 2004, Reilly | 13 Cluster RCTs<br>Included studies<br>with a sample<br>size > 30 | USA (n = 6),<br>Switzerland (n = 1),<br>Germany (n = 1),<br>Israel (n = 2),<br>Belgium (n = 1),<br>France (n=1)<br>Australia (n = 1) | 1 study low risk of<br>bias (Burgi et al<br>2012), others<br>insufficient info<br>for evaluation |

## Repository

|                      |                                                                                                                                                                                                                                                                                                                                                                                                            |                                                                                                                                                                                                                                         |                                                                                                                                             |                                                                                                                               |           |                                                                                                                                                                                                     |                                                                                                                                                  |                                                                                                          |                                                              |
|----------------------|------------------------------------------------------------------------------------------------------------------------------------------------------------------------------------------------------------------------------------------------------------------------------------------------------------------------------------------------------------------------------------------------------------|-----------------------------------------------------------------------------------------------------------------------------------------------------------------------------------------------------------------------------------------|---------------------------------------------------------------------------------------------------------------------------------------------|-------------------------------------------------------------------------------------------------------------------------------|-----------|-----------------------------------------------------------------------------------------------------------------------------------------------------------------------------------------------------|--------------------------------------------------------------------------------------------------------------------------------------------------|----------------------------------------------------------------------------------------------------------|--------------------------------------------------------------|
| Mikkelsen et al 2014 | Analyse the effectiveness of different strategies in relation to their influence on children's food choice at an early age, provide recommendations for future interventions                                                                                                                                                                                                                               | 3 to 6 year-olds, educators – NOT parents<br>Preschools (13), kindergartens (10) and day care facilities (3)<br><br>16-6102 children<br>26 centres                                                                                      | Any healthy eating intervention attempting to prevent obesity with a focus on diet, nutrition, food, eating or meals in day care facilities | PubMed, Scopus, Web of Science and CINAHL (n=4)<br>Reference lists                                                            | 1980-2014 | et al 2006.<br>26<br>8 single interventions<br>11 educational<br>7 multi-component                                                                                                                  | Intervention studies with baseline and follow-up measurements<br><br>11 RCTs, 9 quasi RCTs, 1 cross-over, 2 pre-post test design, 3 cluster -RCT | North America (n=17), South America (n=1), Asia (n=5), European context (n=3)                            | 4 weak, 9 moderate, 10 strong, 3 very strong quality         |
| Morris et al 2015    | (1) How have parents been incorporated into childhood obesity interventions conducted in ECEC settings and to what extent, if any, does their involvement impact the outcomes of the intervention?<br>(2) What are the methodological limitations of ECEC childhood obesity prevention interventions that have included a parental component?<br>(3) What recommendations can be made for future research? | Parents of children in ECEC settings<br><br>22,267 children plus DeCoen's et al 2012 not reported (range 289-12000), 275 centres plus those from 4 unspecified studies (range 7-64 centres)<br>Most trials recruited <20 centres (6/11) | Any interventions to prevent obesity or risk factors (diet, PA) with a parental component. Single setting interventions excluded.           | Academic Source Complete, CINAHL, Global Health, ERIC, Health Source, Medline and PsychInfo (n=7)<br>Reference lists searched | 2000-2014 | 12/15 studies<br>Excluded<br>Story et al 2012 (schools), Reilly et al 2006 (PA only), Dennison et al 2004 (sedentary behaviour only), De Bock et al 2013 (PA only).<br>Included De Bock et al 2012. | Experimental studies<br><br>2 RCT, 6 cluster RCT, 3 quasi-experimental, 1 prospective cohort                                                     | USA (n=4), Australia (n=2), China (n=1), Belgium (n=1), Germany (n=2), Columbia (n=1), Switzerland (n=1) | 6 fair, 7 good<br>No studies classified as excellent or poor |
| Nixon et al 2012     | To identify the most effective behavioural models and behaviour change strategies, underpinning preschool and school-based interventions aimed at preventing obesity in 4–6-year-olds.                                                                                                                                                                                                                     | 4-6 year olds preschool- and school based<br><br>no sample sizes reported                                                                                                                                                               | Any preschool- or school based interventions for preventing obesity in 4–6-year-olds                                                        | MEDLINE, EMBASE, CINAHL, PsycINFO and The Cochrane Library (n=5)<br><br>Hand Searching of reviews and reference lists         | 1995-2010 | 4/9 (12 studies including schools)<br><br>4 studies diet-related (5 studies preschoolers but PA only. Four studies                                                                                  | RCT, Non-RCT<br>With 'before and after' measures in the same children<br>Plus follow-up periods of 6 months or longer<br><br>1 RCT, 3 cluster    | Germany (n=1), Nth America (n=1), Asia (n=1), Australia (n=1)                                            | 1 strong, 3 moderate, quality                                |

## Repository

|                    |                                                                                                                                                                                                                                                                                                                                              |                                                                                                                         |                                                                                                                                                        |                                                                                                                                                                                           |                    |                                                                                                                                                                        |                                                                                                                                                                                                   |                                                                  |                                       |
|--------------------|----------------------------------------------------------------------------------------------------------------------------------------------------------------------------------------------------------------------------------------------------------------------------------------------------------------------------------------------|-------------------------------------------------------------------------------------------------------------------------|--------------------------------------------------------------------------------------------------------------------------------------------------------|-------------------------------------------------------------------------------------------------------------------------------------------------------------------------------------------|--------------------|------------------------------------------------------------------------------------------------------------------------------------------------------------------------|---------------------------------------------------------------------------------------------------------------------------------------------------------------------------------------------------|------------------------------------------------------------------|---------------------------------------|
|                    |                                                                                                                                                                                                                                                                                                                                              |                                                                                                                         |                                                                                                                                                        |                                                                                                                                                                                           |                    | diet-related but school-based)                                                                                                                                         | RCT                                                                                                                                                                                               |                                                                  |                                       |
| Sisson et al 2016  | Identify interventions that target obesogenic behaviours in child care centres and<br>(1) Examine the duration, use of behavioural theory, and intervention targets, including the child care environment, teacher, parents, and children;<br>(2) Describe the intervention strategies and their effectiveness                               | 3-to-5-year-old children<br>Child care settings<br><br>no sample sizes reported                                         | Interventions designed to reduce obesity and improve obesogenic behaviours, including physical activity, diet, and screen time, at child care centres. | PubMed, PsychInfo, and Ovid (n=3)<br>Manual searches of personal records were also conducted, along with screening of previous review articles and reference lists of identified articles | Up to January 2016 | 44/45 (71 interventions including PA only)<br>Excluded Cespedes et al 2013 as in Colombia<br><br>22 RCTs, 19 quasi-experimental or pre-post design, 3 non-experimental | All experimental designs were eligible                                                                                                                                                            | Not stated                                                       | 22 Level II, 19 Level III, 3 Level IV |
| Ward S, et al 2015 | To identify<br>a) if childcare educators' practices predict or are associated with pre-schoolers' physical activity and eating behaviours in childcare centres<br>b) to assess the effectiveness of interventions that control educators' practices or behaviours in order to improve pre-schoolers' physical activity and eating behaviours | Pre-schoolers, educators<br>Childcare facilities<br><br>19-97 children, 1-19 childcare centres                          | Any interventions assessing the impact of childcare educators' practices or behaviours on children's physical activity or eating behaviours            | PubMed, The Cochrane Library, Science Direct, SportDiscus, CINAHL and Wiley (n=6)<br><br>Reference lists and reviews                                                                      | Up to July 2015    | 5/15<br><br>Only 5 studies assessed diet, rest PA only<br><br>2 quasi-experimental, 2 pre-post design, 1 cross-over RCT                                                | All types of quantitative study designs but multi-component interventions, or those where the study results could not be explained solely by the educators' practices or behaviours were excluded | 5/5 USA for diet-related<br><br>USA (n=14),<br>Netherlands (n=1) | 3 low, 2 moderate quality             |
| Ward S, et al 2016 | To examine the relationship between preschoolers' eating behaviours and physical activity, and those of their peers                                                                                                                                                                                                                          | 2 and 5 years of age<br><br>No specific setting defined, but mostly childcare centres<br><br>14-66 children (total 260) | Quantitative studies examining the relationship between preschoolers' eating behaviours                                                                | Science Direct, PsychInfo, PubMed, Medline, ERIC, SportDiscus and CINAHL                                                                                                                  | Up to July 2015    | 7/13<br><br>3 non-randomised controlled trials, 3 pre-                                                                                                                 | All types of quantitative studies, including non-randomized and observational                                                                                                                     | USA (n=4), England (n= 1), Wales (n= 1), Brazil (n=1)            | 2 moderate, 5 low quality             |

## Repository

|                      |                                                                                                                                                                                                                                                                                                                                                                                                                                                                                                                                                                                                                                                                                                                                                                                                                                             |                                                                                                                                                                 |                                                                                                                                                                                                                                |                                                                                       |              |                                                                                                                                                                                              |                                                                                                                                              |                                                                                                                         |                                                 |
|----------------------|---------------------------------------------------------------------------------------------------------------------------------------------------------------------------------------------------------------------------------------------------------------------------------------------------------------------------------------------------------------------------------------------------------------------------------------------------------------------------------------------------------------------------------------------------------------------------------------------------------------------------------------------------------------------------------------------------------------------------------------------------------------------------------------------------------------------------------------------|-----------------------------------------------------------------------------------------------------------------------------------------------------------------|--------------------------------------------------------------------------------------------------------------------------------------------------------------------------------------------------------------------------------|---------------------------------------------------------------------------------------|--------------|----------------------------------------------------------------------------------------------------------------------------------------------------------------------------------------------|----------------------------------------------------------------------------------------------------------------------------------------------|-------------------------------------------------------------------------------------------------------------------------|-------------------------------------------------|
|                      |                                                                                                                                                                                                                                                                                                                                                                                                                                                                                                                                                                                                                                                                                                                                                                                                                                             | children in 6 single-centre studies). Sample not reported for one study.                                                                                        | and physical activity, and those of their peers<br><br>How preschoolers' eating behaviours and physical activity relate to their peers' behaviours                                                                             | (n=7)<br>Reference lists and reviews                                                  |              | post design, 1 RCT                                                                                                                                                                           | type as can provide impetus for future RCT                                                                                                   |                                                                                                                         |                                                 |
| Ward, D et al 2016   | To identify the most promising obesity prevention intervention characteristics associated with successful behavioural and/or anthropometric outcomes<br>1. Is <b>intervention strength</b> related to successful behavioural and/or anthropometric outcomes?<br>2. Are interventions that incorporate <b>parent engagement</b> more effective than those that do not?<br>3. Can specific <b>intervention elements</b> be identified that relate to desired outcomes, including number of intervention strategies used, potential impact of the strategies, and frequency and duration of these strategies?<br>4. Is overall <b>study quality</b> related to successful behavioural and/or anthropometric outcomes?<br><br>Developed a coding strategy to assess intervention strength and allow for examination of several study questions. | Children ages 0–6 years (actually children aged 2-6 years), mostly low and middle SES<br>Early care and education centres<br><br>1-31 centres, 57-2062 children | Any obesity prevention interventions in centre-based ECE settings<br><br>What specific intervention characteristics and strategies contribute to intervention effectiveness for obesity prevention in centre-based child care. | PubMed, ERIC, and Web of Science (n=3)<br>Reference searching of reviews and articles | 2010-2015    | 18/43 unique interventions, 26 had dietary-component but only 18 reported outcomes<br><br>6 Pre-post design, 4 cluster RCT, 4 RCT, 3 randomised cross-over trial, 1 quasi-experimental trial | All study designs, except case studies, were included if a pre- and post-evaluation was conducted and used an objective or validated measure | US (n=11), Australia (n=1), Germany (n=1), Switzerland (n=1), Chile (n=1), Belgium (n=1), Spain (n=1), and Turkey (n=1) | 3 strong, 4 moderate, and 11 weak global rating |
| Wolfenden et al 2016 | <i>Primary</i><br>Examine the effectiveness                                                                                                                                                                                                                                                                                                                                                                                                                                                                                                                                                                                                                                                                                                                                                                                                 | Children typically up to the age of 5-6 years, staff                                                                                                            | Any strategy with                                                                                                                                                                                                              | Cochrane Central                                                                      | Up to August | 8/10                                                                                                                                                                                         | Any study (randomised or                                                                                                                     | USA (n=5), Australia (n=2),                                                                                             | All studies had high risk of bias               |

## Repository

|                 |                                                                                                                                                                                                                                                                                                                                                                                                                                                                                                                                                                           |                                                                                                                                                                                                                                                                                                                                                                                       |                                                                                                                                                                                                                        |                                                                                                                                                                                                                                                                                                                                              |                   |                                                                                                                                                                                                                                |                                                                                                                                                                                                                                                                                              |                                                                                                                        |                                                                                                                                          |
|-----------------|---------------------------------------------------------------------------------------------------------------------------------------------------------------------------------------------------------------------------------------------------------------------------------------------------------------------------------------------------------------------------------------------------------------------------------------------------------------------------------------------------------------------------------------------------------------------------|---------------------------------------------------------------------------------------------------------------------------------------------------------------------------------------------------------------------------------------------------------------------------------------------------------------------------------------------------------------------------------------|------------------------------------------------------------------------------------------------------------------------------------------------------------------------------------------------------------------------|----------------------------------------------------------------------------------------------------------------------------------------------------------------------------------------------------------------------------------------------------------------------------------------------------------------------------------------------|-------------------|--------------------------------------------------------------------------------------------------------------------------------------------------------------------------------------------------------------------------------|----------------------------------------------------------------------------------------------------------------------------------------------------------------------------------------------------------------------------------------------------------------------------------------------|------------------------------------------------------------------------------------------------------------------------|------------------------------------------------------------------------------------------------------------------------------------------|
|                 | <p>of strategies aimed at improving the implementation of policies, practices or programmes by childcare services that promote child healthy eating, physical activity and/or obesity prevention.</p> <p><i>Secondary</i></p> <ol style="list-style-type: none"> <li>1. describe the impact of such strategies on childcare service staff knowledge, skills or attitudes;</li> <li>2. describe the cost or cost-effectiveness of such strategies;</li> <li>3. describe any adverse effects of such strategies on childcare services, service staff or children</li> </ol> | <p>Centre-based childcare services (preschools, nurseries, long day-care services and kindergartens that cater for children prior to compulsory schooling).</p> <p>Most trials recruited &lt;20 centres<br/>1053 centres participated across all trials<br/>5/8 diet-related studies in childcare services in disadvantaged areas or serving disadvantaged. 3/8 SES not described</p> | <p>the primary intent of improving the implementation</p> <p>of policies, practices or programmes in centre-based childcare services to promote healthy eating, physical activity or prevent unhealthy weight gain</p> | <p>Register of Controlled trials (CENTRAL), MEDLINE, MEDLINE In Process, EMBASE, PsycINFO, ERIC, CINAHL and SCOPUS (n=8)</p> <p>Reference lists of included trials, hand searched two international implementation science journals<br/>World Health Organization International Clinical Trials Registry Platform and ClinicalTrials.gov</p> | 2015              | <p>2 healthy eating, 6 healthy eating and physical activity</p> <p>3 Cluster-randomised controlled-trial, 2 quasi-experimental trial, 1 randomised trial, 1 randomised controlled trial, 1 randomised parallel-group trial</p> | <p>non-randomised) with a parallel control group that compared any strategy to improve the implementation of a healthy eating, physical activity or obesity prevention policy, practice or programme to no intervention, 'usual' practice or an alternative strategy. Included baseline.</p> | Ireland (n=1)                                                                                                          | for at least one domain                                                                                                                  |
| Zhou et al 2012 | <p><i>Primary</i></p> <p>To assess the efficacy of childhood obesity interventions in childcare settings on outcomes of dietary intake, physical activity, and adiposity,</p> <p><i>Secondary</i></p> <p>To identify gaps and limitations of the existing studies and recommend priorities for future research.</p>                                                                                                                                                                                                                                                       | <p>Children up to school age<br/>Childcare facilities for preschool aged children who are not old enough to attend primary or elementary schools (childcare centers, preschools, daycares, nursery schools, and kindergartens if childcare)</p> <p>In the 13/15 diet-related studies total participants at baseline n=5620 (range 101-2658 children), # centres not recorded</p>      | Any intervention aimed at childhood obesity prevention with a controlled study design                                                                                                                                  | <p>PubMed, Web of Science, Cochrane Library, ERIC (n=4)</p> <p>Reviewed reference lists of included intervention studies and other relevant review articles</p>                                                                                                                                                                              | Jan 2000-Aug 2012 | <p>13/15 studies</p> <p>12 RCTs-Cluster, 1 cluster controlled design for diet-related</p>                                                                                                                                      | Any interventions aimed at childhood obesity prevention with; controlled study design (randomized or nonrandomized), outcome measures included adiposity (e.g., body mass index)                                                                                                             | <p>United States (n=4), Israel (n=3), Australia (n=1), Germany (n=2), France (n=1), Switzerland (n=1), China (n=1)</p> | All studies rated high for performance bias, most others for attrition bias, one for selection bias. All low risk of bias for reporting. |

Abbreviations: CCT controlled clinical trial; ECEC Early Childhood Education and Care; FDC Family Day Care; PA physical activity; RCT randomised controlled trial
