# Supplementary material for: Characteristics of Effective Interventions Promoting Healthy Eating for Pre-Schoolers in Childcare Settings: An Umbrella Review
Source: MDPI journal article supplement (doi:10.3390/nu10030293), 2018-03-01
Supplement: s1 [file s1]

Table S2: Critical appraisal results for the included reviews using 11 critical appraisal criteria (The Johanna Briggs Institute 2014)

| Quality Assessment Criteria | Is the review question clearly and explicitly stated | Were the inclusion criteria appropriate for the review question | Was the search strategy appropriate | Were the sources and resources used to search for studies adequate | Were the criteria for appraising studies appropriate | Was critical appraisal conducted by two or more reviewers independently | Were there methods to minimize errors in data extraction | Were the methods used to combine studies appropriate | Was the likelihood of publication bias assessed | Were recommendations for policy and/or Practice supported by the reported data | Were the specific directives for new research appropriate | Included / Excluded |
|-----------------------------|------------------------------------------------------|-----------------------------------------------------------------|-------------------------------------|--------------------------------------------------------------------|------------------------------------------------------|-------------------------------------------------------------------------|----------------------------------------------------------|------------------------------------------------------|-------------------------------------------------|--------------------------------------------------------------------------------|-----------------------------------------------------------|---------------------|
| Bell & Golley 2015          | Y                                                    | Y                                                               | Y                                   | Y                                                                  | Y                                                    | N                                                                       | Y                                                        | Y                                                    | Y                                               | Y                                                                              | Y                                                         | Included            |
| Campbell & Hesketh 2007     | Y                                                    | Y                                                               | U                                   | U                                                                  | N                                                    | U                                                                       | U                                                        | Y                                                    | N                                               | N                                                                              | N                                                         | Excluded            |
| Hesketh & Campbell 2010     | Y                                                    | Y                                                               | N                                   | Y                                                                  | Y                                                    | Y                                                                       | Y                                                        | Y                                                    | Y                                               | Y                                                                              | Y                                                         | Included            |
| Larson et al 2011           | Y                                                    | U                                                               | N                                   | N                                                                  | N                                                    | U                                                                       | N                                                        | Y                                                    | N                                               | Y                                                                              | Y                                                         | Excluded            |
| Ling et al 2016             | Y                                                    | Y                                                               | Y                                   | Y                                                                  | Y                                                    | Y                                                                       | Y                                                        | Y                                                    | Y                                               | Y                                                                              | Y                                                         | Included            |
| Mikkelsen et al 2014        | Y                                                    | Y                                                               | Y                                   | Y                                                                  | Y                                                    | Y                                                                       | Y                                                        | Y                                                    | Y                                               | Y                                                                              | Y                                                         | Included            |
| Morris et al 2015           | Y                                                    | Y                                                               | Y                                   | Y                                                                  | Y                                                    | U                                                                       | Y                                                        | Y                                                    | N                                               | Y                                                                              | Y                                                         | Included            |
| Nixon et al 2012            | Y                                                    | Y                                                               | Y                                   | Y                                                                  | Y                                                    | Y                                                                       | U                                                        | Y                                                    | Y                                               | Y                                                                              | Y                                                         | Included            |
| Sisson et al 2016           | Y                                                    | Y                                                               | Y                                   | Y                                                                  | N                                                    | Y                                                                       | Y                                                        | Y                                                    | Y                                               | Y                                                                              | Y                                                         | Included            |
| Ward, D et al 2016          | Y                                                    | Y                                                               | Y                                   | Y                                                                  | Y                                                    | Y                                                                       | Y                                                        | Y                                                    | Y                                               | Y                                                                              | Y                                                         | Included            |
| Ward S, et al 2015          | Y                                                    | Y                                                               | Y                                   | Y                                                                  | Y                                                    | Y                                                                       | Y                                                        | Y                                                    | Y                                               | Y                                                                              | Y                                                         | Included            |
| Ward S, et al 2016          | Y                                                    | Y                                                               | Y                                   | Y                                                                  | Y                                                    | Y                                                                       | Y                                                        | Y                                                    | Y                                               | Y                                                                              | Y                                                         | Included            |
| Wolfenden et al 2016        | Y                                                    | Y                                                               | Y                                   | Y                                                                  | Y                                                    | Y                                                                       | Y                                                        | Y                                                    | Y                                               | Y                                                                              | Y                                                         | Included            |
| Zhou et al 2012             | Y                                                    | Y                                                               | Y                                   | Y                                                                  | Y                                                    | Y                                                                       | Y                                                        | Y                                                    | Y                                               | Y                                                                              | Y                                                         | Included            |

N, no, critical appraisal criterion was not met; N/A, criteria appraisal criterion was not applicable; U, unclear whether critical appraisal criterion was met; Y, yes, critical appraisal criterion was met.
