# Supplementary material for: Characteristics of Effective Interventions Promoting Healthy Eating for Pre-Schoolers in Childcare Settings: An Umbrella Review
Source: Nutrients. 2018 Mar 1;10(3):293. doi: 10.3390/nu10030293 (PMC5872711; doi:10.3390/nu10030293)
Supplement: Supplementary file 1 [file nutrients-10-00293-s001.zip]

Archive with 5 entries (5 files):
- Table S4_Summary of the evidence from selected reviews.pdf
- Figure S1_PRISMA flowchart of the selection process for systematic reviews.pdf
- Table S1_Record of search strategies.pdf
- Table S2. Quality Assessment of Selected Reviews_Umbrella Review_manuscript.pdf
- Table S3_ Characteristics of included systematic reviews.pdf
