# Supplementary figures and images for: Characteristics of Effective Interventions Promoting Healthy Eating for Pre-Schoolers in Childcare Settings: An Umbrella Review
Source: MDPI journal article supplement (doi:10.3390/nu10030293), 2018-03-01

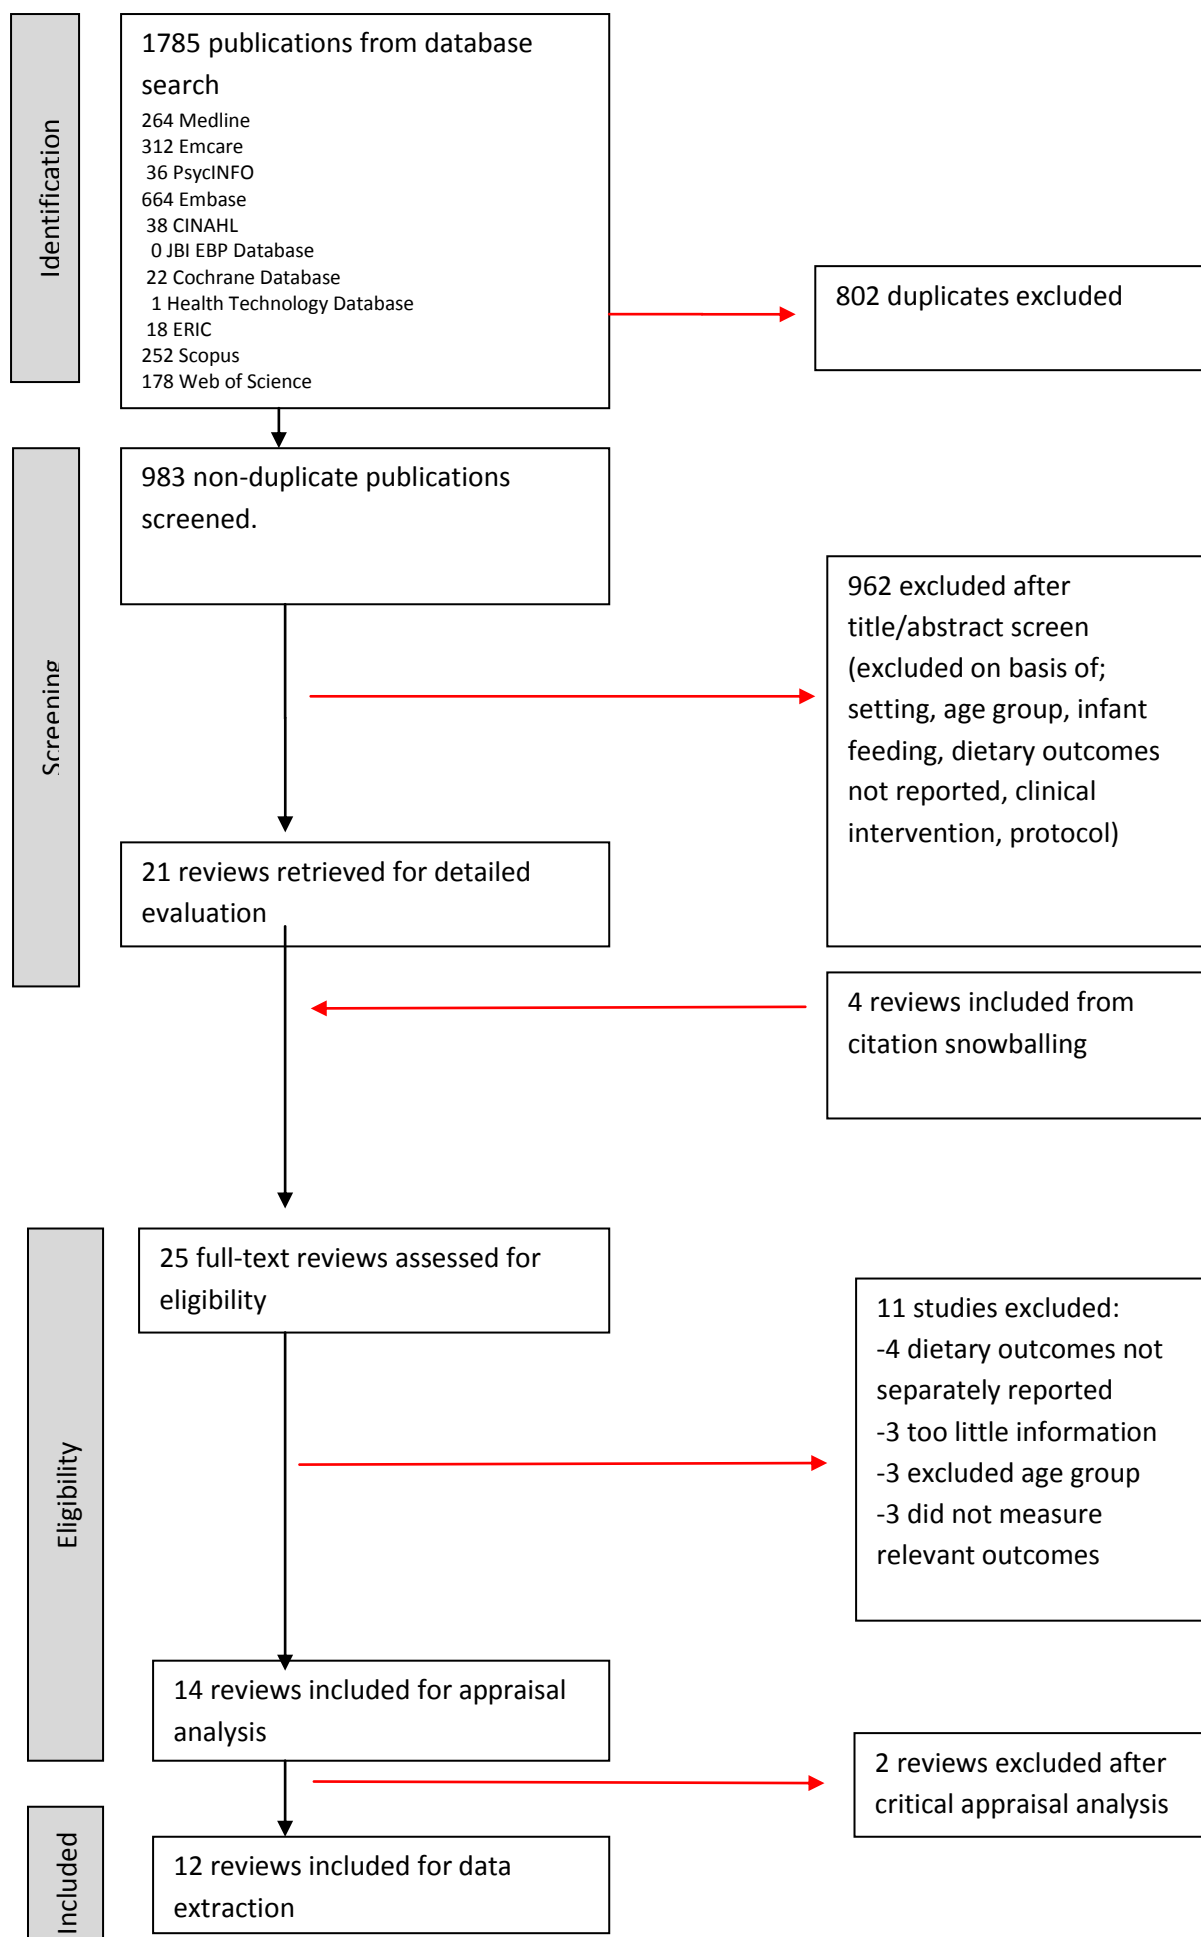

**Figure S1:** PRISMA flowchart of the selection process for systematic reviews

Supplement: s1 [file s1]
